# Supplementary material for: Effects of water hyacinth biochar on lettuce growth in cadmium-contaminated soil
Source: Frontiers journal article supplement (doi:10.3389/fsoil.2022.998654), 2022-11-08
Supplement: Data_Sheet_1.docx [file Data_Sheet_1.docx]

**Effects of water hyacinth biochar on lettuce growth** **in cadmium contaminated soil**

Yin Xina,b Wang yalia Wei li’ea Huang Huajuna Yu Chenglonga Zhou chunhuoa,b*

a. College of Land Resources and Environment, Jiangxi Agricultural University, Nanchang, Jiangxi, 330045, China

b. Key Innovation Center of Agricultural Waste Resource Utilization and Non-point Source Pollution Prevention and Control of Jiangxi Province, Nanchang, Jiangxi, 330045, China

Fig.S1 Comparison of the lettuce yield after water hyacinth biochar application with different preparation condition

Fig.S2 Comparison of catalase activities before and after application of water hyacinth biochar.


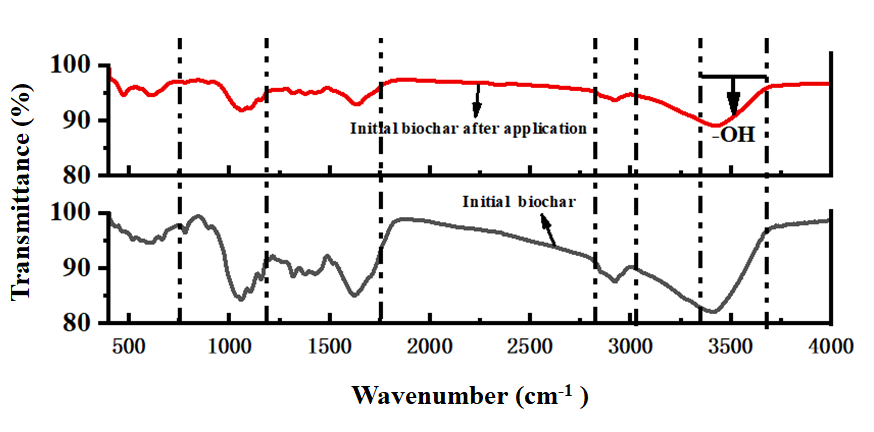


Fig.S3 FTIR analysis of biochar before and after application
